# Supplementary material for: Collection of polycyclic aromatic sulfur heterocycles from asphalt fumes and quantification by an HPLC-DAD method
Source: Royal Society of Chemistry journal article supplement (doi:10.1039/d1ay00429h), 2021-01-01
Supplement: d1ay00429h1.pdf [file d1ay00429h1.pdf]

1     **Collection of polycyclic aromatic sulfur heterocycles from asphalt fumes**  
2                     **and quantification by HPLC-DAD method**

3  
4     Rejane Secretti Carginin <sup>a</sup>, Franciele Rovasi Adolfo <sup>a</sup>, Paulo Cícero do  
5     Nascimento <sup>a,\*</sup>, Patrícia Schmidt <sup>a</sup>, Letícia Callegaro Brudi <sup>a</sup>, Leandro Machado  
6     de Carvalho <sup>a</sup>, Denise Bohrer do Nascimento <sup>a</sup>, Margareth Carvalho Coutinho  
7     Cravo <sup>b</sup>, Luis Alberto Herrmann do Nascimento <sup>b</sup>

8     <sup>a</sup> Departamento de Química, Universidade Federal de Santa Maria, Santa Maria,  
9     RS, Brasil;

10    <sup>b</sup> CENPES/Petrobras, Cidade Universitária, Rio de Janeiro, RJ, Brasil.

11  
12    **CONTACT** Paulo Cícero do Nascimento. E-mail: pcn1954@gmail.com.  
13    Departamento de Química, Universidade Federal de Santa Maria, C.P. 5051,  
14    97110-970 Santa Maria - RS, Brasil.

15  
16                     **SUPPLEMENTARY DATA**

17  
18  
19    **S1. Solvent evaporation**

20  
21             The PASHs standards solutions are supplied in ampules containing 100  
22     mg L<sup>-1</sup> of each compound dissolved in toluene. This solvent was partially replaced  
23     by dichloromethane to prepare PASHs stock solutions. Afterwards, the solvents  
24     toluene and dichloromethane were also evaporated under a nitrogen stream to  
25     be replaced by acetonitrile during the preparation of the PASHs working

26 solutions. These steps were necessary to avoid both, baseline drift and an  
 27 interferent early peak related to toluene that prevents a good resolution of PASHs  
 28 peaks mainly when a mix of PASHs was injected. It important to point out that the  
 29 complete elimination of toluene was not necessary. A reduction of the toluene  
 30 peak by 90% was enough to avoid the co-elution of the PASHs 1 and 2 (peak 0  
 31 in Figure 1) besides the baseline drift. The PASHs recoveries after these two  
 32 steps of solvent replacement lie between 85.37% for Benzothiophene and  
 33 96.47% for 1,2,3,4-Tetrahydrobenzo[b]naphtho[1,2-d]thiophene.

34

35 **Table S1: Resolution and selectivity for C18 and 3 PAH column.**

| Peak identification | Resolution |       | Selectivity |      |
|---------------------|------------|-------|-------------|------|
|                     | C18        | 3 PAH | C18         | 3PAH |
| 1                   | 11.70      | 14.75 | 3.12        | 2.20 |
| 2                   | 1.33       | 0.86  | 1.07        | 1.02 |
| 3                   | 0.90       | 1.23  | 1.03        | 1.02 |
| 4                   | 1.13       | 1.84  | 1.04        | 1.04 |
| 5                   | 9.26       | 0.94  | 1.27        | 1.02 |
| 6                   | 0.93       | 8.13  | 1.02        | 1.20 |
| 7                   | 5.72       | 1.40  | 1.14        | 1.03 |
| 8                   | 1.27       | 5.61  | 1.04        | 1.10 |
| 9                   | 1.09       | 1.77  | 1.03        | 1.04 |
| 10                  | 2.58       | 2.04  | 1.05        | 1.04 |
| 11                  | 1.96       | 0.98  | 1.03        | 1.02 |
| 12                  | 2.94       | 3.69  | 1.05        | 1.08 |
| 13                  | 1.70       | 1.51  | 1.03        | 1.02 |
| 14                  | 1.08       | 0.74  | 1.02        | 1.01 |
| 15                  | 1.42       | 2.55  | 1.03        | 1.05 |
| 16                  | 1.33       | 3.70  | 1.02        | 1.06 |
| 17                  | 1.20       | 1.75  | 1.02        | 1.02 |
| 18                  | 0.84       | 1.39  | 1.01        | 1.01 |
| 19                  | 2.83       | 1.19  | 1.04        | 1.01 |
| 20                  | 0.84       | 0.63  | 1.01        | 1.00 |
| 21                  | 6.30       | 5.59  | 1.07        | 1.04 |
| 22                  | 1.86       | 0.57  | 1.02        | 1.00 |
| 23                  | 3.20       | 2.78  | 1.04        | 1.03 |
| 24                  | 1.60       | 1.54  | 1.02        | 1.02 |
| 25                  | 1.44       | 2.26  | 1.01        | 1.03 |

|    |       |      |      |      |
|----|-------|------|------|------|
| 26 | 1.10  | 2.71 | 1.01 | 1.02 |
| 27 | 10.69 | 0.75 | 1.11 | 1.01 |
| 28 | 4.36  | ni   | 1.03 | ni   |
| 29 | 7.40  | ni   | 1.05 | ni   |

ni: not identified see Figure S1.

36

37

38

39

40

*Insert Figure S1*

41

42

43

44

45

**Table S2: Resolution using ACN and Methanol**

| Peak identification | Resolution |          |
|---------------------|------------|----------|
|                     | ACN        | Methanol |
| 1                   | 11.56      | 5.52     |
| 2                   | 10.56      | 8.45     |
| 3                   | 1.15       | 2.39     |
| 4                   | 1.62       | 2.23     |
| 5                   | 1.00       | 4.04     |
| 6                   | 4.10       | 1.00     |
| 7                   | 6.05       | 8.71     |
| 8                   | 1.00       | 1.45     |
| 9                   | 6.14       | 1.50     |
| 10                  | 1.00       | 1.00     |
| 11                  | 1.17       | 2.08     |
| 12                  | 1.00       | 1.83     |
| 13                  | 2.81       | 4.36     |
| 14                  | 1.79       | 1.85     |
| 15                  | 1.77       | 1.00     |
| 16                  | 2.42       | 1.55     |
| 17                  | 1.80       | 1.60     |
| 18                  | 1.46       | 1.52     |
| 19                  | 1.00       | 1.00     |
| 20                  | 1.50       | 1.79     |
| 21                  | 1.00       | 2.19     |
| 22                  | 1.47       | 2.49     |

|    |       |      |
|----|-------|------|
| 23 | 1.00  | 3.87 |
| 24 | 1.00  | 1.35 |
| 25 | 6.13  | 3.33 |
| 26 | 2.90  | 2.52 |
| 27 | 3.84  | 9.56 |
| 28 | 2.10  | 1.69 |
| 29 | 1.96  | ni   |
| 30 | 1.00  | ni   |
| 31 | 12.77 | ni   |
| 32 | 7.40  | ni   |

ni: not identified see Figure S2.

46

47

48 The values of resolution with the solvent THF were not calculated because the  
 49 baseline drift was high with this solvent. So, THF was not used in the sequence  
 50 (See Figure S2).

51

52

*Insert Figure S2*

53

54

55

56 **Table S3: Variation of the resolution of the compounds in relation to**  
 57 **temperature**

| Peak Identification | Temperatures |       |       |       |
|---------------------|--------------|-------|-------|-------|
|                     | 20 °C        | 30 °C | 40 °C | 50 °C |
| 1                   | 11.54        | 10.22 | 10.72 | 7.45  |
| 2                   | 11.82        | 9.88  | 8.75  | 6.56  |
| 3                   | 1.00         | 1.00  | 1.00  | 1.00  |
| 4                   | 1.00         | 1.00  | 1.44  | 1.81  |
| 5                   | 1.00         | 1.00  | 7.34  | 7.69  |
| 6                   | 1.00         | 8.81  | 1.00  | 1.00  |
| 7                   | 8.72         | 1.00  | 4.98  | 6.40  |
| 8                   | 1.00         | 6.39  | 1.45  | 1.65  |
| 9                   | 5.89         | 1.00  | 1.00  | 1.00  |
| 10                  | 1.20         | 1.21  | 2.39  | 3.44  |
| 11                  | 1.00         | 1.00  | 1.34  | 1.70  |
| 12                  | 2.02         | 2.56  | 3.89  | 2.83  |
| 13                  | 3.02         | 1.52  | 1.66  | 1.16  |
| 14                  | 1.92         | 3.18  | 1.27  | 1.68  |
| 15                  | 2.81         | 1.56  | 1.86  | 1.74  |

|    |       |       |      |      |
|----|-------|-------|------|------|
| 16 | 1.33  | 1.59  | 1.00 | 1.00 |
| 17 | 1.47  | 1.00  | 1.00 | 1.00 |
| 18 | 1.64  | 1,48  | 1.73 | 2.19 |
| 19 | 1.65  | 0.17  | 3.35 | 5.04 |
| 20 | 1.42  | 1.55  | 1.79 | 2.35 |
| 21 | 1.00  | 1.00  | 2.83 | 1.63 |
| 22 | 3.05  | 5.62  | 1.76 | 0.87 |
| 23 | 1.00  | 2.19  | 0.95 | 1.35 |
| 24 | 4.35  | 2.99  | 1.27 | 8.07 |
| 25 | 2.20  | 1.87  | 8.53 | 7.22 |
| 26 | 4.04  | 1.69  | 7.41 | 6.09 |
| 27 | 1.74  | 0.70  | 7.85 | ni   |
| 28 | 1.24  | 10.14 | ni   | ni   |
| 29 | 1.09  | 4.82  | ni   | ni   |
| 30 | 10.57 | ni    | ni   | ni   |
| 31 | 3.96  | ni    | ni   | ni   |

ni: not identified see Figure S3.

58

59

60 With the increase in temperature, there is no identification of some peaks  
61 in the chromatographic run, indicating a greater coelution of the compounds.

62

63 **Table S4: Resolutions of the compounds mentioned in Figure 3**

64

| PASHs                                    | Resolutions |       |       |       |
|------------------------------------------|-------------|-------|-------|-------|
|                                          | 20 °C       | 30 °C | 40 °C | 50 °C |
| 4,6-Diethyldibenzothiophene (24)         | 1.74        | 1.87  | 1.76  | 1.63  |
| Cyclohexylmethyl-2-benzothiophene (25)   | 1.24        | 1.69  | 0.95  | 0.87  |
| 2,4,6,8-Tetramethyldibenzothiophene (26) | 1.09        | 0.70  | 1.27  | 1.35  |

65

66

67

68

69

*Insert Figure S3*

70

71

72

73 **Table S5: Recovery tests of the fortified sample AC-02**

| Peak Identification | PASHs                              | Recovery (%) |
|---------------------|------------------------------------|--------------|
| 1                   | Benzothiophene                     | 88.92        |
| 2                   | 3-Methylbenzothiophene             | 79.76        |
| 3                   | 2-Methylbenzothiophene             | 74.82        |
| 4                   | 2-Phenylthiophene                  | 40.97        |
| 5                   | 2,3-Dimethylbenzothiophene         | 33.07        |
| 6                   | 2,3,7-Trimethylbenzothiophene;     | 34.67        |
| 7                   | 1,2,3,4-Tetrahydrodibenzothiophene | 11.79        |
| 8                   | 2,3,4,7-Tetramethylbenzothiophene  | 14.28        |

74

75

76

77

78

*Insert Figure S4*
