# Supplementary figures and images for: Collection of polycyclic aromatic sulfur heterocycles from asphalt fumes and quantification by an HPLC-DAD method
Source: Royal Society of Chemistry journal article supplement (doi:10.1039/d1ay00429h), 2021-01-01

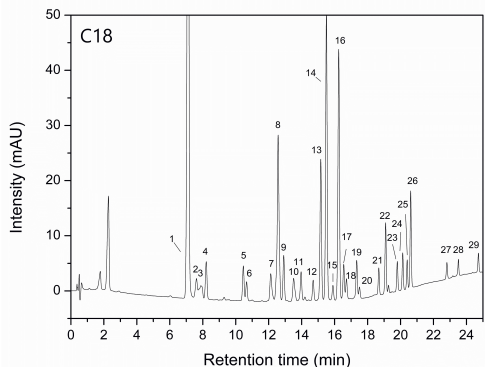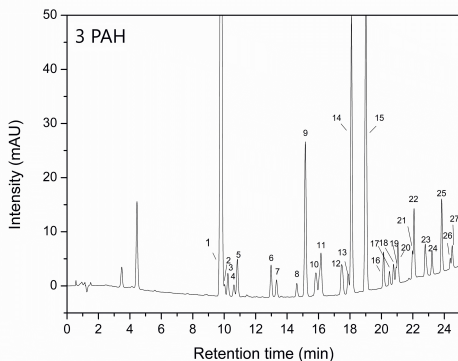

Supplement: d1ay00429h3.pdf [file d1ay00429h3.pdf]

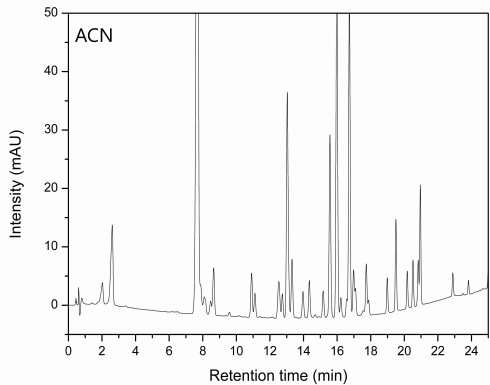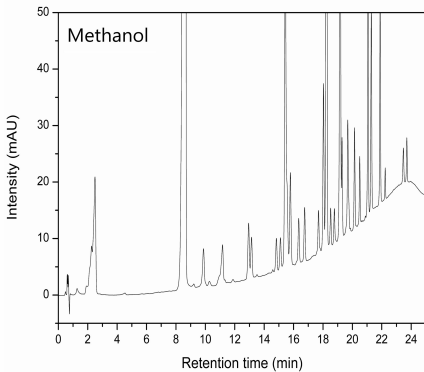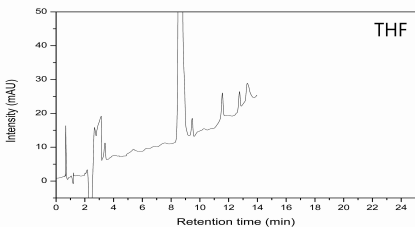

Supplement: d1ay00429h4.pdf [file d1ay00429h4.pdf]

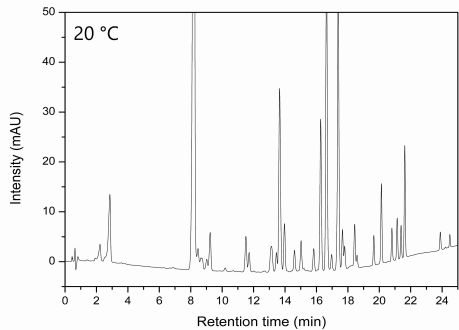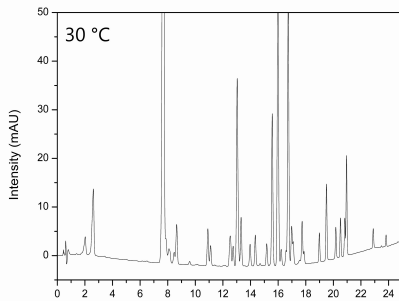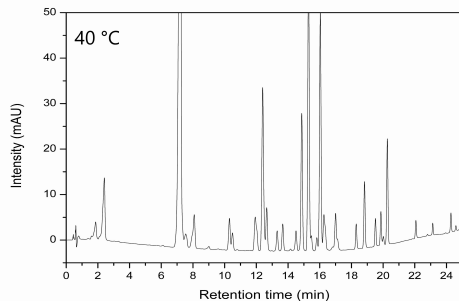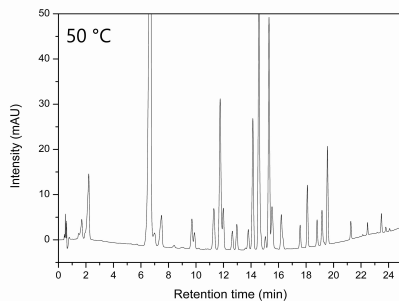

Supplement: d1ay00429h5.pdf [file d1ay00429h5.pdf]

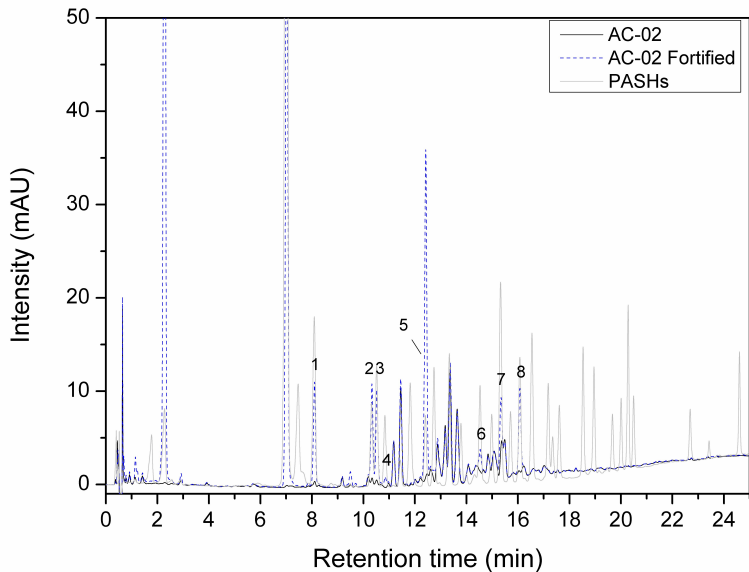

Supplement: d1ay00429h6.pdf [file d1ay00429h6.pdf]
